# Supplementary material for: Human Nutrition Research in the Data Era: Results of 11 Reports on the Effects of a Multiple-Micronutrient-Intervention Study
Source: MDPI journal article supplement (doi:10.3390/nu16020188), 2024-01-05
Supplement: s1 [file s1]

# File S4

Impact of multi-micronutrient supplementation on lipidemia of children and adolescents  
*Clin Nutr* 39, 2211-2219 (2019)

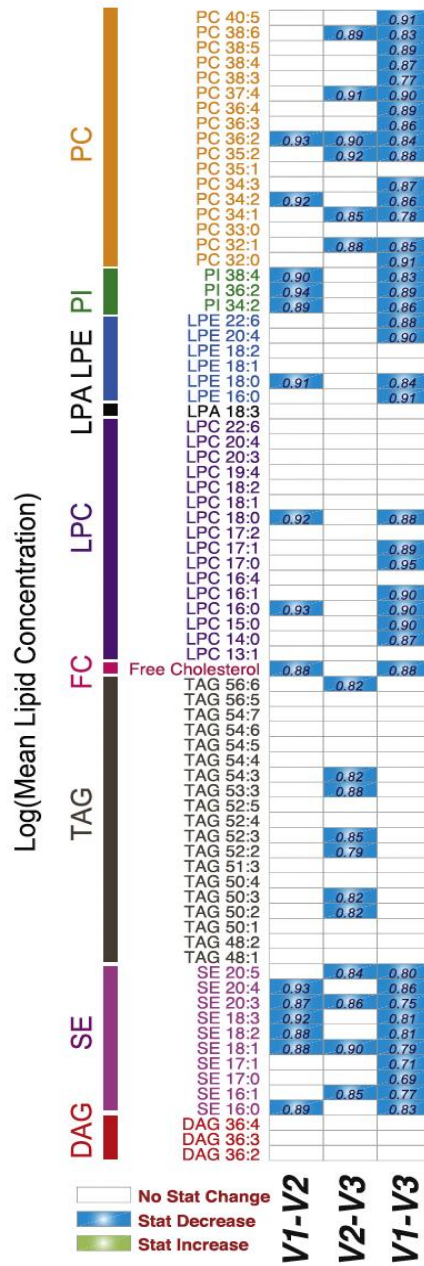

**Fig. S2. Changes in lipid levels measured across visits.** Increase or decrease in lipid levels in cross-visit comparisons are indicated by blue (decrease) or green (increase) filled boxes. Mean fold changes of lipids across visits are indicated by the numbers in the boxes.
