# Supplementary material for: Human Nutrition Research in the Data Era: Results of 11 Reports on the Effects of a Multiple-Micronutrient-Intervention Study
Source: MDPI journal article supplement (doi:10.3390/nu16020188), 2024-01-05
Supplement: s1 [file s1]

# File S2: Micronutrient Program Publications

## McCabe-Sellers et al - 2008 Community Based Participatory Research

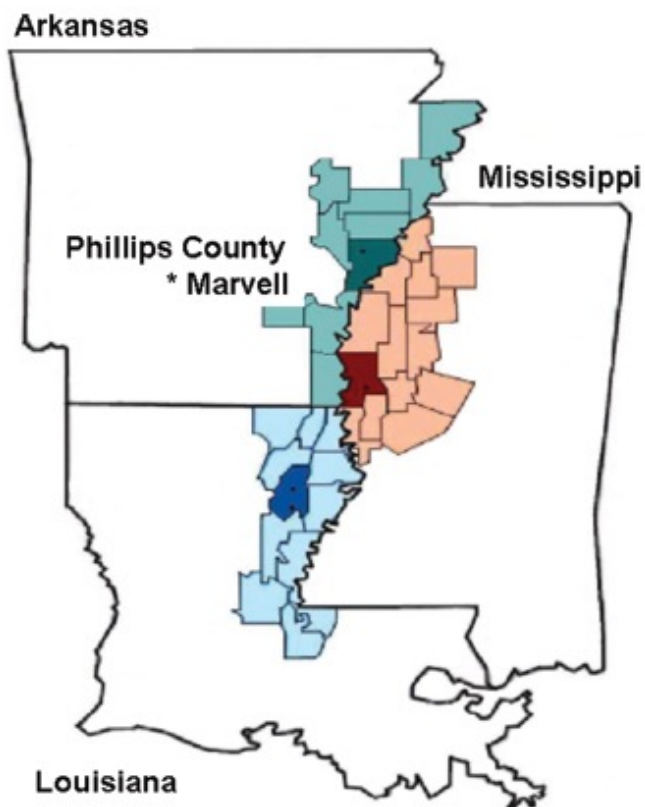

**FIG. 1.** The map and participants of the delta nutrition intervention research initiative. Shaded areas are the counties involved in the program, and dark shades are the “hubs” of each local.

## Morine, Monteiro et al - 2014 Vitamin B2 and B9 association with ARA, EPA, DHA

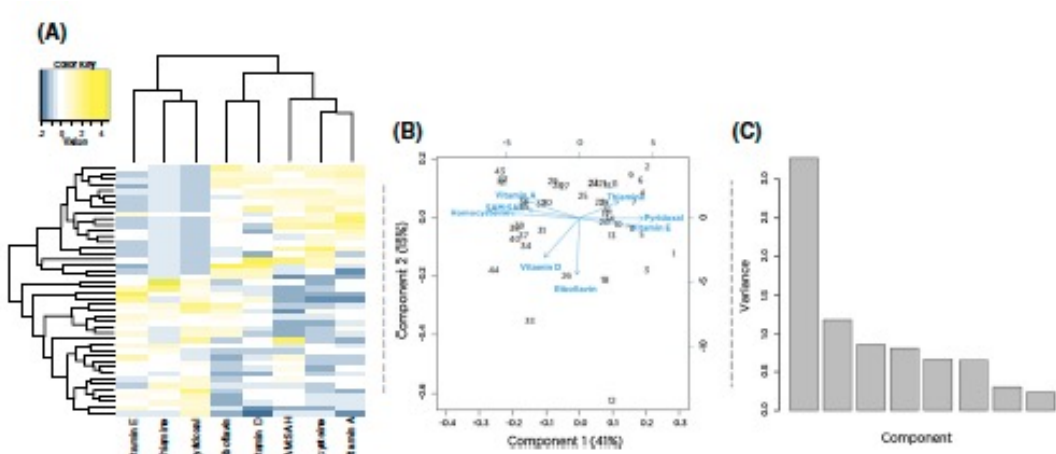

**Fig. 1** Metabolite-level heat map and principal component analysis of vitamin levels. a Metabolite heat map where individuals are represented in the rows, and mean value of metabolite levels from three blood samplings is in the columns. b Principal component analysis of mean values of vitamin or metabolites. Numbers indicate values for individuals (c). Variances in each principal component (see “Materials and methods” section for details)

## Scott-Boyer et al - 2016 Co-factor Network

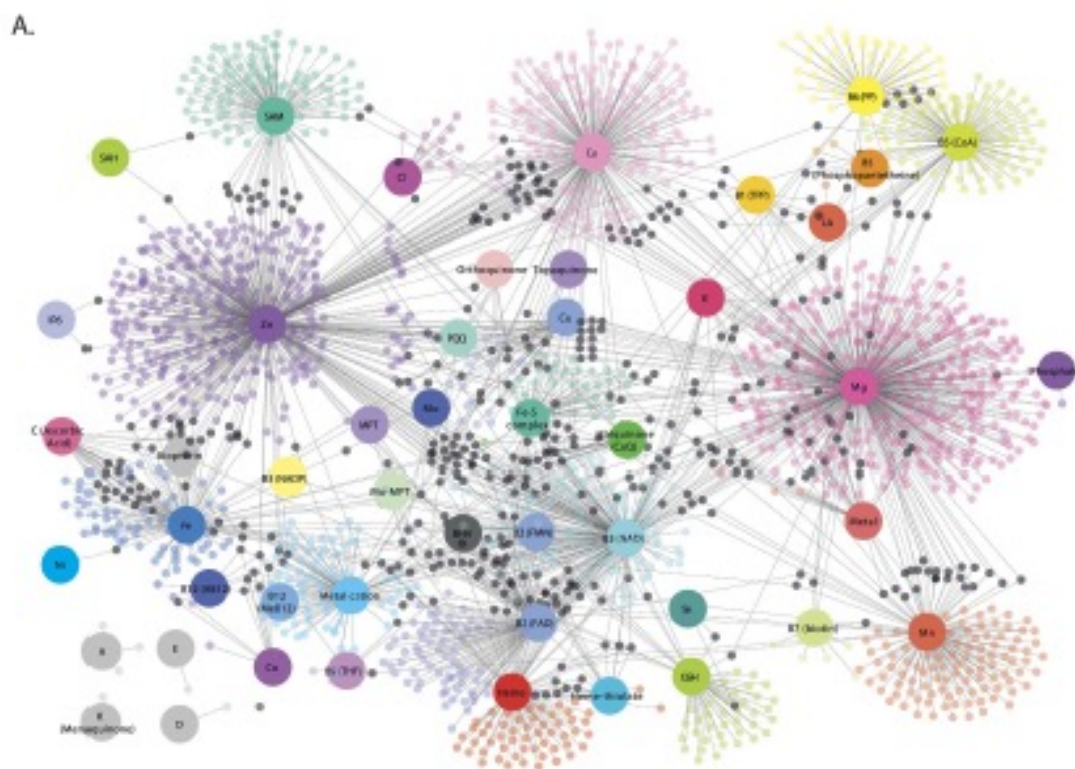

## Mitchell et al - 2014 B Vitamins and Cognitive Function

**Table 1**  
Genetic polymorphisms in B vitamin-related enzymes.

| Gene                                                                      | Enzyme function                                                                                             | Mutation effect                                                                         | Disease association                                                           |
|---------------------------------------------------------------------------|-------------------------------------------------------------------------------------------------------------|-----------------------------------------------------------------------------------------|-------------------------------------------------------------------------------|
| Folate hydrolase (FOLH1) C484T, C1561T                                    | Catalyzes the hydrolysis of N-acetylaspartylglutamate to glutamate and N-acetylaspartate                    | Unknown                                                                                 | Depression, schizophrenia (Roffman et al., 2013), dementia (Kim et al., 2010) |
| Methylene tetrahydrofolate reductase (MTHFR) C677T                        | Converts CH <sub>3</sub> THF to CH <sub>2</sub> THF                                                         | T homozygote is less efficient, thus increased plasma homocysteine                      | Depression, schizophrenia, mental retardation, dementia, bipolar disorder     |
| Methionine synthase (MTR) A2756G                                          | Converts homocysteine into methionine                                                                       | G allele may increase homocysteine levels                                               | Dementia, depression                                                          |
| Fucosyltransferase 2 (FUT2) (rs492602)                                    | Immune response protein which modulates B12 transport in the gut                                            | GG carriers have higher plasma B12                                                      | Intelligence                                                                  |
| Dihydrofolate reductase (DHFR) 19bp deletion in the intron 1 (rs70991108) | Converts dihydrofolate into tetrahydrofolate, using NADPH (for purine synthesis)                            | Reduces protein expression by eliminating Sp1 transcription factor binding site         | Intellectual ability                                                          |
| Methylenetetrahydrofolate dehydrogenase (MTHFD1) G1958A                   | Converts 5,10-methylenetetrahydrofolate and NADP <sup>+</sup> into 5,10-methylenetetrahydrofolate and NADPH | A allele increases plasma homocysteine                                                  | Dementia                                                                      |
| Cystathionine β synthase (CBS) 844ins68                                   | Converts serine and homocysteine (with B6) into cystathionine                                               | Insert increases plasma homocysteine                                                    | Dementia, schizophrenia                                                       |
| Methionine synthase reductase (MTRR or MSR) A66G                          | Converts SAH into SAM (with B12)                                                                            | G allele increases plasma homocysteine                                                  | Mental retardation                                                            |
| Haptocorrin (TCN1) TC C776G                                               | Protects cobalamin from degradation in the stomach                                                          | Unknown                                                                                 | Dementia                                                                      |
| Transcobalamin II receptor (TCN2) G775C                                   | Binds cobalamin in the portal circulation                                                                   | More efficient vitamin B12 transport and binding mechanisms versus R allele homozygotes | Depression                                                                    |
| Folate receptor 1 (FOLR1) G1816A and G1814A                               | Activated by folate to induce signaling cascade                                                             | Double mutation (1816A and 1841A) possibly increases homocysteine levels                | Tendency of double mutation (1816A and 1841A) to coincide with dementia       |

## Kaput et al - 2014 Consensus Statement on Micronutrient Research

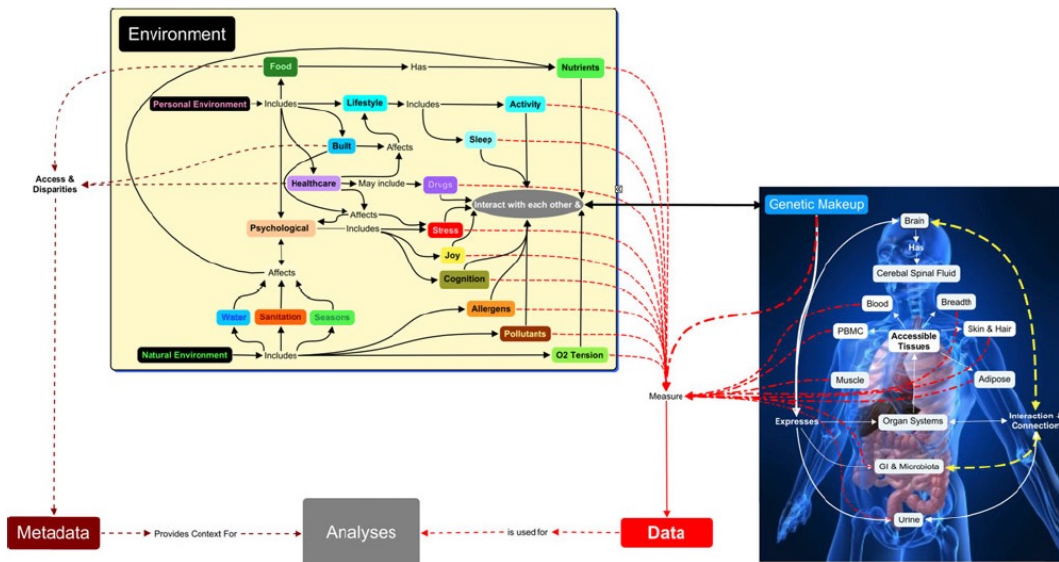

## Parolo et al - 2017 Positive Selection of Micronutrient Transporters

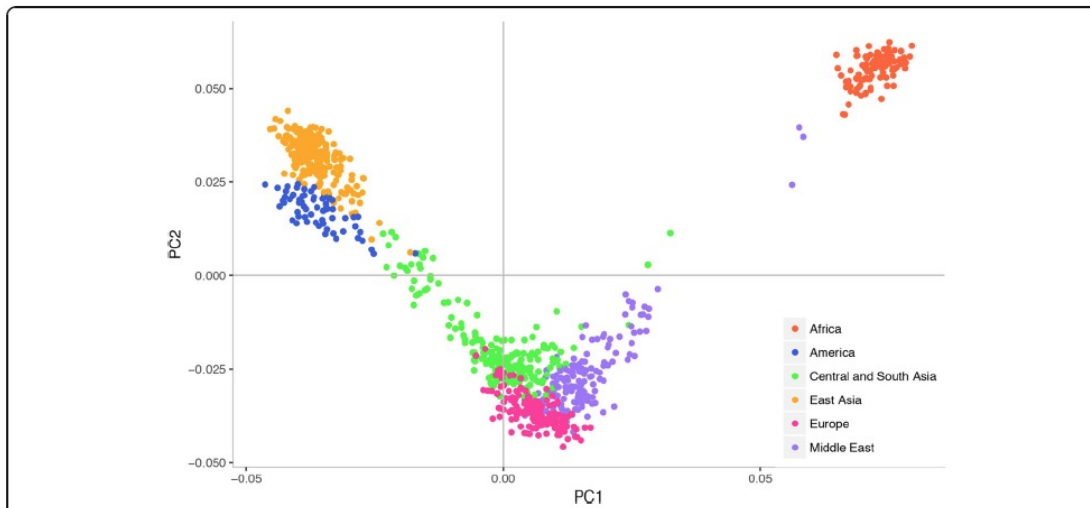

**Fig. 1** PCA result. The scatterplot shows the first two components of PCA analysis based on genotype data of SNPs located in genes coding for transporters of cofactors in individuals from HGGP dataset. Each point corresponds to one individual, color-coded according to the geographic region of origin as shown in the legend

## Monteiro et al - 2014 Methylation Potential & Diet, Genotype, Protein, Metabolite Levels

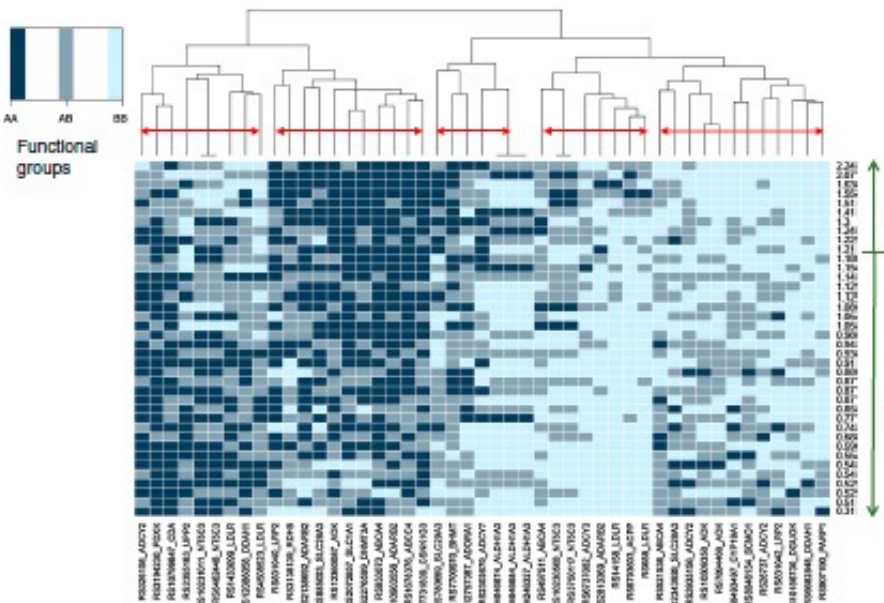

**Fig. 2** Heatmap of significant SNPs associated with SAM/SAH ratio. SNPs statistically associated with SAM/SAH ratio (left axis, displayed high SAM/SAH to low SAM/SAH) corrected for multiple comparisons

were identified using procedures described in “Methods.” Two hundred and sixty-seven (267) genes were used for genetic analysis (Supplements 3 and 5)

## Monteiro et al - 2015 Review

## The genomics of micronutrient requirements

## Hoeller et al - 2018 Review of Micronutrient Analysis

|                                              | Vitamin B <sub>1</sub>                                                                                                                | Vitamin B <sub>2</sub>                                                                                                                | Vitamin B <sub>3</sub> (Niacin)                  | Vitamin B <sub>5</sub> (Pantoic acid)              | Vitamin B <sub>6</sub>                                                        | Vitamin B <sub>7</sub> (Biotin)                                                                                                                                           | Vitamin B <sub>9</sub> (Folate)                                         | Vitamin B <sub>12</sub>                                                                              | Vitamin C       |
|----------------------------------------------|---------------------------------------------------------------------------------------------------------------------------------------|---------------------------------------------------------------------------------------------------------------------------------------|--------------------------------------------------|----------------------------------------------------|-------------------------------------------------------------------------------|---------------------------------------------------------------------------------------------------------------------------------------------------------------------------|-------------------------------------------------------------------------|------------------------------------------------------------------------------------------------------|-----------------|
| Best marker                                  | Erythrocyte transketolase, erythrocyte thiamine diphosphate                                                                           | Erythrocyte glutathione reductase                                                                                                     | Plasma niacin metabolites, but not reliable      | Pantoic acid after liberation of bound forms       | Pyridoxal-5'-phosphate                                                        | Urinary biotin                                                                                                                                                            | Serum folate (short-term status) and red cell folate (long-term status) | Serum total cobalamin (short-term status) and red cell cobalamin (long-term status)                  | Serum ascorbate |
| State of the art methodology                 | Erythrocyte transketolase activity coefficient (ETAC) assay or HPLC analysis of whole blood or erythrocytes                           | ECGR assay or LC-MS/MS analysis of erythrocyte thiamine diphosphate                                                                   | LC-MS/MS                                         | LC-MS/MS                                           | HPLC or LC-MS/MS                                                              | LC-MS/MS or microbiology                                                                                                                                                  | LC-MS/MS and newer microbiological methods                              | GC-MS for MMA, binding assays linked to fluorescence detection systems for B <sub>12</sub> and holTC | HPLC            |
| Matrix <sup>a</sup>                          | Washed red blood cells                                                                                                                | Washed red blood cells                                                                                                                | Plasma, Urine                                    | Whole blood                                        | Plasma or serum                                                               | Urine                                                                                                                                                                     | Serum and whole blood lysed into 1% ascorbic acid                       | Serum or plasma                                                                                      | Plasma or serum |
| Concentration range (matrix and marker)      | 132-284 nmol/L (erythrocyte, thiamine diphosphate)                                                                                    | 1.00-1.10 (erythrocyte, ECGR coefficient)                                                                                             | 1.57-2.66 μmol/L (whole blood, pantoic acid)     | 49.8 ± 1.2 nmol/L (plasma, pyridoxal-5'-phosphate) | 6-50 μg/24-hr (urine, biotin)                                                 | 238 ± 102 pmol/L (plasma, B <sub>12</sub> )                                                                                                                               | 63.0 ± 19.0 μmol/L (plasma, ascorbic acid)                              |                                                                                                      |                 |
| Gaps/issues                                  | Lack of validated status cut-offs. Assay standardization against true biological function; inter-laboratory standardization required. | Lack of validated status cut-offs. Assay standardization against true biological function; inter-laboratory standardization required. | Validated plasma markers of niacin status        | Simple sample preparation methodology              | Inter-laboratory standardization required                                     | Analysis of red cell folates by LC-MS/MS. Issues with conjugation of folates to mono-glutamate forms. Affinity of binding protein assays to different folate derivatives. | Factors influencing MMA that are not related to B <sub>12</sub> status  | Inter-laboratory standardization required; results influenced by stabilization at time of collection |                 |
| Outlook: promising techniques or development | In the field alternative: point-of-care analysis; LC-MS/MS analysis of free and phosphorylated thiamine forms                         | In the field alternative: point-of-care analysis                                                                                      | In the field alternative: point-of-care analysis |                                                    | Dried blood spotting; point-of-care analysis; validation of metabolite ratios |                                                                                                                                                                           | HoloTC assay                                                            | In the field alternative: point-of-care analysis                                                     |                 |

<sup>a</sup> All matrices are derived from venous blood, typically 100 μL is required for analysis.  
<sup>b</sup> Please note that these data are only indicative of the physiological range in the specified matrix as reported in the literature<sup>a</sup> and that they may vary according to the population and used analytics. Consequently, they are not meant to be used as reference ranges nor to define micronutrient deficiency and nutritional recommendations.
