# Supplementary material for: Human Nutrition Research in the Data Era: Results of 11 Reports on the Effects of a Multiple-Micronutrient-Intervention Study
Source: MDPI journal article supplement (doi:10.3390/nu16020188), 2024-01-05
Supplement: s1 [file s1]

| File S3                                           |                             |                              |                              |                   |                |
|---------------------------------------------------|-----------------------------|------------------------------|------------------------------|-------------------|----------------|
| Nestrovit Composition, DRI's, and UL <sup>a</sup> |                             |                              |                              |                   |                |
| Micronutrient                                     | Chemical Form               | 2 Tablets <sup>b</sup> (10g) | 3 Tablets <sup>c</sup> (15g) | DRI's<br>9 - 13 y | UL<br>9 – 13 y |
| Vitamin A                                         | Retinol palmitate           | 534 µg                       | 801 µg                       | 600 µg            | 1700 µg        |
| Vitamin E                                         | α-Tocopherol acetate        | 6.6 mg                       | 9.9 mg                       | 11 mg             | 600 mg         |
| Folate                                            | Tetrahydrofolic acid        | 133.3 µg                     | 200 µg                       | 300 µg            | 600 µg         |
| Vitamin B1                                        | Thiamine pyrophosphate      | 0.93 mg                      | 1,4 mg                       | 0.9 mg            | -              |
| Vitamin B2                                        | Flavin adenine dinucleotide | 1.17 mg                      | 1.76 mg                      | 0.9 mg            | -              |
| Niacin                                            | Nicotinamide diphosphate    | 12 mg                        | 18 mg                        | 12 mg             | 20 mg          |
| Vitamin B6                                        | Pyridoxal 5-phosphate       | 1.33 mg                      | 2 mg                         | 1.0 mg            | 60 mg          |
| Vitamin B12                                       | Methylcobalamin             | 0.73 µg                      | 1.1 µg                       | 1.8 µg            | -              |
| Vitamin D3                                        | Cholecalciferol             | 3.4 µg                       | 5.1 µg                       | 5.0 µg            | 50 µg          |
| Vitamin C                                         | Calcium ascorbate           | 40 mg                        | 60 mg                        | 45 mg             | 1200 mg        |
| Biotin                                            | Biotin                      | 13.3 µg                      | 20.0 µg                      | 20 µg             | -              |
| Vitamin B5                                        | Pantothenic acid            | 4 mg                         | 6 mg                         | 4 mg              | -              |
| Calcium                                           | Calcium                     | 191.3mg                      | 287 mg                       | 1300 mg           | 2500 mg        |
| Phosphorus                                        | Phosphorus                  | 144.6mg                      | 217 mg                       | 1250 mg           | 4000 mg        |
| Iron                                              | Iron                        | 4,3 mg                       | 6.5 mg                       | 8 mg              | 40 mg          |
| Magnesium                                         | Magnesium                   | 83.3 mg                      | 125 mg                       | 240 mg            | 350 mg         |
| Zinc                                              | Zinc                        | 5.3 mg                       | 6 mg                         | 8 mg              | 23 mg          |

<sup>a</sup> Composition in 2013 and 2014. Newer versions differ in nutritional and vitamins content (<https://www.nestrovit.ch>)

<sup>b</sup> Two tablets provided 52 kilocalories (primarily from 0.52 g protein, 4.4 g carbohydrate, and 3.4 g of fat) which represents 3.3% of the recommended energy intake for a sedentary 9 to10 years old child (1600kcal/day).

- ° Three tablets provided 77 kilocalories (primarily from 0.8g protein, 6.7g carbohydrate, and 5.2g of fat) which represents 4.3% of the recommended energy intake for a sedentary 11 to 12 years old adolescent (1800kcal/day) and 3.9% of the recommended energy intake (2000 kcal/day) for a sedentary 13 years olds.
- d The USDA Scientific Report of the 2015 Dietary Guidelines Advisory Committee (pages 101 – 102 of [90]) stated that boys and girls in the 9-13 years old group may be vulnerable to nutritional risks since they do not consume adequate amount of fruits and vegetables and their intake of refined grains is high.
