# Supplementary material for: Human Nutrition Research in the Data Era: Results of 11 Reports on the Effects of a Multiple-Micronutrient-Intervention Study
Source: Nutrients. 2024 Jan 5;16(2):188. doi: 10.3390/nu16020188 (PMC10819666; doi:10.3390/nu16020188)
Supplement: Supplementary file 1 [file nutrients-16-00188-s001.zip]

Archive with 4 entries (4 files):
- Kaput_Nutrients_File S1.pdf
- Kaput_Nutrients_File S2.pdf
- Kaput_Nutrients_File S3.pdf
- Kaput_Nutrients_File S4.pdf
